# Supplementary material for: A novel strategy to identify analytical markers of Cerebralcare Granule for quality assessment by ultra-high performance chromatography and chemometric analysis
Source: Royal Society of Chemistry journal article supplement (doi:10.1039/c5ay00707k), 2015-01-01
Supplement: c5ay00707k1.pdf [file c5ay00707k1.pdf]

## Supporting Information

A novel strategy to identify analytical markers of Cerebralcare Granule for quality assessment by ultra-high performance chromatography and chemometric analysis

### Contents

**Figure.S1** The *I<sub>r</sub>* value under different condition.

**Figure.S2** Hierarchical Cluster Analysis: dendrogram based on Euclidean distance of 30 batches of CG samples.

**Table.S1** A summary of the investigated CG samples.

**Table.S2** The quality grade assigned by SQFM and the acceptance criteria.

**Table.S3** The similarity analysis results obtained using SQFM.

**Table.S4** The data matrix of similarity calculation.

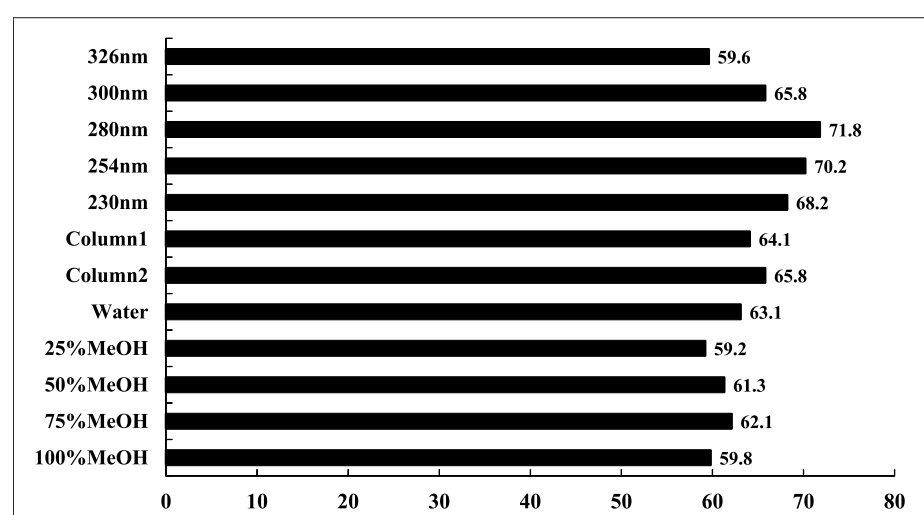

**Figure. S1** The *I<sub>r</sub>* value under different condition (extraction solvents, detection wavelength, extraction method, column). The index of the fingerprint information amount (*I<sub>r</sub>*) was adopted to screen the optimized condition for sample extraction and separation and *I<sub>r</sub>* was the index which represents the signal size, signal homogenization and the information amount.

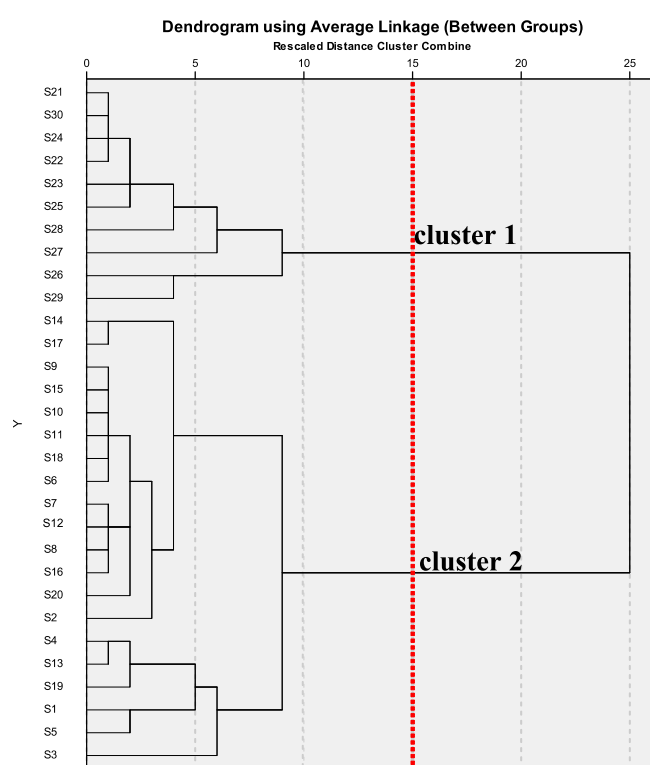

**Figure.S2** Hierarchical Cluster Analysis: dendrogram based on Euclidean distance of 30 batches of CG samples. Samples S01-S20 were in cluster 1; samples S21-S30 in cluster 2.

**Table.S1** A summary of the investigated CG samples.

| Sample | Brand | Date of manufacture | Date of expiration | Date of analysis | Type      |
|--------|-------|---------------------|--------------------|------------------|-----------|
| S1     | Tasly | 2013.05             | 2016.05            | 2014.10          | Qualified |
| S2     | Tasly | 2013.06             | 2016.06            | 2014.10          | Qualified |
| S3     | Tasly | 2013.05             | 2016.05            | 2014.10          | Qualified |
| S4     | Tasly | 2013.05             | 2016.05            | 2014.10          | Qualified |
| S5     | Tasly | 2013.06             | 2016.06            | 2014.10          | Qualified |
| S6     | Tasly | 2013.06             | 2016.06            | 2014.10          | Qualified |
| S7     | Tasly | 2013.11             | 2016.11            | 2014.10          | Qualified |
| S8     | Tasly | 2013.10             | 2016.10            | 2014.10          | Qualified |
| S9     | Tasly | 2013.05             | 2016.05            | 2014.10          | Qualified |
| S10    | Tasly | 2013.05             | 2016.05            | 2014.10          | Qualified |
| S11    | Tasly | 2013.05             | 2016.05            | 2014.10          | Qualified |
| S12    | Tasly | 2013.05             | 2016.05            | 2014.10          | Qualified |
| S13    | Tasly | 2013.05             | 2016.05            | 2014.10          | Qualified |
| S14    | Tasly | 2013.05             | 2016.05            | 2014.10          | Qualified |
| S15    | Tasly | 2013.04             | 2016.04            | 2014.10          | Qualified |
| S16    | Tasly | 2013.05             | 2016.05            | 2014.10          | Qualified |
| S17    | Tasly | 2013.05             | 2016.05            | 2014.10          | Qualified |
| S18    | Tasly | 2013.05             | 2016.05            | 2014.10          | Qualified |
| S19    | Tasly | 2013.05             | 2016.05            | 2014.10          | Qualified |
| S20    | Tasly | 2013.05             | 2016.05            | 2014.10          | Qualified |
| S21    | Tasly | 2009.12             | 2013.12            | 2014.10          | Expired   |
| S22    | Tasly | 2009.12             | 2013.12            | 2014.10          | Expired   |
| S23    | Tasly | 2009.06             | 2013.06            | 2014.10          | Expired   |
| S24    | Tasly | 2009.06             | 2013.06            | 2014.10          | Expired   |
| S25    | Tasly | 2009.07             | 2013.07            | 2014.10          | Expired   |
| S26    | Tasly | 2009.12             | 2013.12            | 2014.10          | Expired   |
| S27    | Tasly | 2010.01             | 2014.01            | 2014.10          | Expired   |
| S28    | Tasly | 2009.08             | 2013.08            | 2014.10          | Expired   |
| S29    | Tasly | 2009.11             | 2013.11            | 2014.10          | Expired   |
| S30    | Tasly | 2009.12             | 2013.12            | 2014.10          | Expired   |

**Table.S2** The quality grade assigned by SQFM and the acceptance criteria

| Quality grade  | 1      | 2      | 3      | 4      | 5        | 6      | 7         | 8               |
|----------------|--------|--------|--------|--------|----------|--------|-----------|-----------------|
| $S_m \geq$     | 0.95   | 0.90   | 0.85   | 0.80   | 0.70     | 0.60   | 0.50      | $S_m \leq 0.50$ |
| $P_m \in$      | 95~105 | 90~110 | 80~120 | 75~125 | 70~130   | 60~140 | 50~150    | 0~∞             |
| $\alpha \leq$  | 0.05   | 0.10   | 0.15   | 0.20   | 0.30     | 0.40   | 0.50      | >0.50           |
| <b>Quality</b> | Best   | Better | Good   | Fine   | Moderate | Common | Defective | Inferior        |

**Table.S3** The similarity analysis results obtained using.

| Parameter | S1     | S2     | S3     | S4     | S5     | S6     | S7     | S8     | S9    | S10     | S11     |
|-----------|--------|--------|--------|--------|--------|--------|--------|--------|-------|---------|---------|
| $S_m$     | 0.73   | 0.88   | 0.81   | 0.80   | 0.82   | 0.92   | 0.92   | 0.89   | 0.91  | 0.90    | 0.90    |
| $P_m$     | 99.70  | 87.00  | 96.40  | 105.50 | 98.10  | 87.90  | 100.30 | 106.90 | 94.00 | 95.60   | 93.00   |
| $\alpha$  | 0.00   | 0.06   | 0.09   | 0.00   | 0.04   | 0.03   | 0.04   | 0.03   | 0.02  | 0.03    | 0.00    |
| Grade     | 4      | 3      | 4      | 4      | 4      | 3      | 2      | 3      | 2     | 3       | 3       |
| Parameter | S12    | S13    | S14    | S15    | S16    | S17    | S18    | S19    | S20   | S21     | S22     |
| $S_m$     | 0.91   | 0.84   | 0.92   | 0.92   | 0.89   | 0.92   | 0.90   | 0.81   | 0.86  | 0.80    | 0.78    |
| $P_m$     | 100.50 | 106.20 | 109.40 | 93.20  | 103.20 | 106.20 | 96.80  | 104.40 | 98.80 | 124.50  | 119.90  |
| $\alpha$  | 0.05   | 0.01   | 0.06   | 0.03   | 0.02   | 0.07   | 0.01   | 0.04   | 0.03  | 0.14    | 0.12    |
| Grade     | 2      | 4      | 2      | 2      | 3      | 2      | 2      | 4      | 3     | 5       | 5       |
| Parameter | S23    | S24    | S25    | S26    | S27    | S28    | S29    | S30    | RFP   | Average | RSD (%) |
| $S_m$     | 0.77   | 0.78   | 0.82   | 0.67   | 0.79   | 0.79   | 0.68   | 0.79   | 1     | 0.08    | 9.39    |
| $P_m$     | 129.60 | 120.80 | 130.60 | 134.90 | 106.80 | 126.20 | 119.50 | 123.70 | 100   | 13.35   | 12.47   |
| $\alpha$  | 0.13   | 0.14   | 0.15   | 0.15   | 0.17   | 0.20   | 0.13   | 0.14   | 0     | 0.06    | 84.83   |
| Grade     | 5      | 5      | 6      | 6      | 5      | 5      | 6      | 5      | 1     | --      | --      |

**Table.S4** The data matrix of similarity calculation.

| No               | G <sup>a</sup> 1 | G2       | G3       | G4       | G5       | G6       | G7       | G8       | G9       | G10      | G11     |
|------------------|------------------|----------|----------|----------|----------|----------|----------|----------|----------|----------|---------|
| S <sup>b</sup> 1 | 60384.7          | 249382.8 | 163386.8 | 187693.3 | 75629.5  | 511672.7 | 231473   | 133186.9 | 196497.1 | 94613.1  | 27879.1 |
| S2               | 43724.8          | 161674.2 | 137016.1 | 124021.3 | 90605.2  | 546964   | 173537.1 | 154422.9 | 239596.7 | 148451   | 35685.9 |
| S3               | 73381.1          | 83965.2  | 130192.5 | 275080.1 | 161687.1 | 616737.3 | 247226.4 | 129084.8 | 227201.5 | 109235.7 | 30509.6 |
| S4               | 97635.9          | 254627.1 | 216220   | 235141.3 | 124897.8 | 531728   | 354669.2 | 122816.3 | 217435.5 | 113916.4 | 28318.4 |
| S5               | 96413            | 172884.1 | 277593.9 | 325757.7 | 190089   | 582789.3 | 321810   | 135536.4 | 292586.9 | 128400.5 | 33995.6 |
| S6               | 79251.3          | 137796.7 | 243486.7 | 270882.7 | 169104.4 | 530975.4 | 289275.7 | 106239.3 | 247053.1 | 119384.9 | 32575.7 |
| S7               | 48932.3          | 175653.9 | 218920   | 245243.4 | 143942.8 | 547900.2 | 245864.8 | 101379.3 | 227663.5 | 115738.5 | 32513.8 |
| S8               | 33409.1          | 204356.6 | 219879.5 | 285317.2 | 264993.4 | 563014.8 | 167803.7 | 124812.2 | 145995.7 | 73662.6  | 29871.8 |
| S9               | 58705.6          | 161194.4 | 242762.4 | 259814.2 | 156318.2 | 532032.8 | 319862.5 | 125532.5 | 209186.8 | 116938   | 36246.4 |
| S10              | 52248            | 138833.1 | 245206.8 | 262938.3 | 56.3     | 540774.3 | 157911   | 128081.6 | 222836.4 | 115109   | 33986.2 |
| S11              | 49924.1          | 198768.3 | 172035.3 | 100291   | 179913.9 | 548123.3 | 309408   | 119640.3 | 247132.2 | 139727.1 | 37894.4 |
| S12              | 58235.5          | 178109.1 | 168093.1 | 115268   | 170938.1 | 561144.5 | 324137.1 | 96868.2  | 215974.8 | 108418.5 | 1025.2  |
| S13              | 44238.6          | 172439.5 | 113317.9 | 147674.2 | 49586.2  | 554024.1 | 315347.1 | 139945.2 | 246432.8 | 115931.8 | 214.5   |
| S14              | 36863            | 309672.5 | 141338.4 | 107721.9 | 178860.8 | 581469.3 | 326274.6 | 151867.3 | 192579.8 | 106253.4 | 5478.2  |
| S15              | 35840.1          | 226124.7 | 492847.8 | 6969.775 | 188926.4 | 603140   | 309316.4 | 137984.8 | 183012   | 150262   | 4521.2  |
| S16              | 57754.4          | 195965.3 | 524030.6 | 8921.475 | 90979.6  | 598262.3 | 344170.3 | 134976.1 | 241908   | 113355.6 | 2541.2  |
| S17              | 50055.2          | 298246.7 | 456037.9 | 7627.4   | 147487.9 | 609107   | 360567.9 | 157017.4 | 179152.9 | 110403   | 2515.3  |
| S18              | 84542.2          | 371811.7 | 645189   | 7079.6   | 91682.4  | 614454.2 | 221583.1 | 122673.3 | 275145.3 | 126793.7 | 3512.8  |
| S19              | 100427.5         | 220496   | 534304.4 | 8498.9   | 229686.8 | 622069.5 | 355927.6 | 144327.1 | 271464.5 | 128867.1 | 1101.2  |
| S20              | 53000.2          | 134417.5 | 552601.2 | 8143.925 | 41799    | 569597.1 | 343071.8 | 148084.3 | 233902.6 | 100959.1 | 112.3   |
| S21              | 33830            | 334751.9 | 490464.1 | 7467.95  | 321.3    | 553532.2 | 285637.8 | 94543.7  | 265439.9 | 218329.7 | 26419.4 |
| S22              | 38906.5          | 191212.8 | 400539.9 | 9061.6   | 90016.8  | 536043.5 | 270054.4 | 122992.3 | 229963.3 | 224434.5 | 15237.6 |
| S23              | 78379.7          | 202254.8 | 458629.8 | 1393.955 | 128770.4 | 554281.3 | 296766.9 | 92724.8  | 281888.9 | 295710.5 | 222.5   |
| S24              | 78979.6          | 203802.9 | 379626.5 | 1784.295 | 46270    | 558523.9 | 299038.4 | 93434.5  | 284046.6 | 297973.9 | 1873    |
| S25              | 52374.2          | 228104.6 | 450500.9 | 1525.48  | 123204.3 | 530993.4 | 308416.1 | 123152.3 | 339369.6 | 373504.4 | 33633.5 |
| S26              | 49681.9          | 152342.1 | 532740   | 1415.92  | 136456.4 | 561418.1 | 344879.8 | 124884.1 | 225844.7 | 246684.4 | 23653.7 |
| S27              | 33259.3          | 169866.5 | 398817.7 | 1699.78  | 152740.3 | 453662.6 | 229382.5 | 77738.4  | 146022.9 | 171606   | 35763.6 |
| S28              | 94909.8          | 379913.3 | 447907.9 | 1628.785 | 65699.5  | 569645   | 242820.2 | 109650.1 | 269602.9 | 209766   | 51520   |
| S29              | 22944.7          | 226102.4 | 431924.2 | 1625.69  | 60052.1  | 532654.9 | 359835.3 | 133735.5 | 224727.2 | 212325   | 55142.5 |
| S30              | 38510.2          | 122236   | 418250.2 | 1493.59  | 150381.2 | 519856   | 12756    | 90721    | 200170.5 | 170706.3 | 42428.8 |

|     |          |          |          |          |          |          |          |          |          |          |          |
|-----|----------|----------|----------|----------|----------|----------|----------|----------|----------|----------|----------|
| No  | G12      | G13      | G14      | G15      | G16      | G17      | G18      | G19      | G20      | G21      | G22      |
| S1  | 46985.4  | 83038.8  | 226784   | 153804.6 | 121669.1 | 135615.6 | 74323.8  | 193828.5 | 261207.3 | 49154.2  | 240691.7 |
| S2  | 51336.4  | 134549.3 | 390038.8 | 155060   | 180432.5 | 160582   | 74999.8  | 206611   | 267624.6 | 46736.5  | 300747.1 |
| S3  | 37286.7  | 80269    | 271487   | 75881.2  | 123796.2 | 161320.3 | 89634.7  | 244794   | 280034.3 | 87952.9  | 289327.5 |
| S4  | 39449    | 131728.5 | 289199.8 | 161559.1 | 147113.5 | 0        | 63386.4  | 174013.8 | 184340   | 62897.7  | 316030.3 |
| S5  | 1254.2   | 133881.1 | 334386.6 | 127998.3 | 122863   | 174934.4 | 76262.1  | 229627.2 | 213637.3 | 90853.3  | 404542.9 |
| S6  | 44446.1  | 126826.4 | 300185.1 | 112509.5 | 113498.2 | 0        | 60500.9  | 199272.4 | 201913.3 | 43489    | 312493.7 |
| S7  | 44027.7  | 127356.3 | 238813.9 | 145188.5 | 123068.7 | 158476.4 | 63671.3  | 179172.9 | 191803.4 | 45393.6  | 320441.4 |
| S8  | 30044.6  | 102934.4 | 288645.6 | 96339.7  | 246706.3 | 172704.6 | 70649.9  | 226403.2 | 230208.5 | 51802.2  | 426231.7 |
| S9  | 41124.9  | 107218.1 | 204212.9 | 143098.8 | 147209.4 | 155942.2 | 59934.4  | 152284.2 | 182297.6 | 73199.4  | 302945.7 |
| S10 | 40077.4  | 109866.1 | 239648.5 | 139208.4 | 155006.7 | 152078.5 | 61025    | 152723.1 | 177528.7 | 57292.4  | 315139.3 |
| S11 | 66584.1  | 134529.2 | 307295.1 | 148679.8 | 233943.1 | 164455.2 | 72251.9  | 199737.5 | 231686.1 | 85664.6  | 337369   |
| S12 | 136063.9 | 4765.2   | 397888.5 | 175669.7 | 220386.2 | 175369.7 | 78275.7  | 233281.9 | 270690.9 | 64867.9  | 469655.6 |
| S13 | 139367.2 | 7895.2   | 293848.9 | 161199.2 | 205374.3 | 171170.7 | 62339.4  | 221503.7 | 279178.8 | 48534.2  | 347969.4 |
| S14 | 114746.8 | 3685.1   | 355445.8 | 131879.7 | 211449.8 | 142983   | 61559    | 216019.5 | 255863.9 | 54762.2  | 372685.9 |
| S15 | 119701.9 | 1587.2   | 383055.5 | 136274.3 | 226247.3 | 138137.7 | 81491.1  | 229513.2 | 325352.8 | 36547.4  | 379611.6 |
| S16 | 139516.6 | 2543.3   | 334875.2 | 150444.4 | 203988.7 | 143694.9 | 60995.5  | 228522.3 | 259832.2 | 81684.6  | 18996.42 |
| S17 | 115277.8 | 2589.1   | 364723.4 | 137321.3 | 229694.3 | 143415.3 | 60192.1  | 256228.1 | 197773   | 58725.4  | 13657.07 |
| S18 | 119980.1 | 1875.3   | 363924.8 | 181096   | 199211.1 | 167559.4 | 64268.1  | 250215.1 | 305322.4 | 66937.4  | 15566.84 |
| S19 | 92238.3  | 3254.2   | 349614.4 | 166189.1 | 358.9    | 152178.2 | 60891.5  | 231846.6 | 279057.5 | 122373.1 | 28458.86 |
| S20 | 135834   | 853.4    | 288484.8 | 149498.2 | 2589.4   | 147163.2 | 54878    | 203736.4 | 251292.4 | 65724.2  | 15284.7  |
| S21 | 129882.9 | 258.6    | 665874.8 | 209487.5 | 3089.786 | 148103.1 | 66763.6  | 290672.8 | 484642.7 | 2744.528 | 726.0656 |
| S22 | 116678.9 | 3587.2   | 632987.6 | 285329.5 | 4208.4   | 134147.1 | 67632.5  | 246046.2 | 473479.5 | 2604.338 | 688.9783 |
| S23 | 69087.4  | 4583.1   | 751871.2 | 348663.4 | 5142.528 | 144174.7 | 60173.3  | 177692.9 | 253.4    | 2888.729 | 764.214  |
| S24 | 75469.9  | 3586.4   | 757626.3 | 351332.2 | 5181.891 | 145278.3 | 61948.4  | 178658.9 | 3585.2   | 2130.217 | 563.5495 |
| S25 | 206798.7 | 589.4    | 793192.2 | 414469.6 | 6113.121 | 191000.4 | 65480.4  | 282149.8 | 228.68   | 28643.5  | 7577.646 |
| S26 | 107215.6 | 7893.1   | 618740.9 | 268731.3 | 3963.588 | 175113.9 | 73612.8  | 297100.3 | 468164   | 43841.8  | 11598.36 |
| S27 | 97806    | 1893     | 493407.2 | 231484.4 | 214347.9 | 139036   | 66900.9  | 224085.3 | 384827.9 | 0        | 442802.1 |
| S28 | 90819.1  | 1896.2   | 686851.7 | 306192.3 | 209243.7 | 161602   | 76682.8  | 259049.6 | 456550   | 51209.9  | 600088.4 |
| S29 | 82530.7  | 97132.4  | 518763.8 | 231426.1 | 144410.4 | 170996.4 | 81043.7  | 238743   | 405752.6 | 67964.2  | 465063.7 |
| S30 | 84545.2  | 110750.9 | 549646.1 | 231122.3 | 236707.9 | 163696.2 | 82132    | 228190.5 | 406594.2 | 68430.3  | 537562.5 |
| No  | G23      | G24      | G25      | G26      | G27      | G28      | G29      | G30      | G31      | G32      | G33      |
| S1  | 57447.1  | 85209.5  | 218368   | 799878.3 | 39066    | 673758.9 | 453595.9 | 510439.3 | 2984757  | 121377   | 1467171  |
| S2  | 39350.7  | 61358.8  | 225528.8 | 243801.2 | 38822.8  | 656616   | 418449.6 | 479788.5 | 2844435  | 110718.5 | 1305742  |
| S3  | 47280    | 58952.1  | 189755.7 | 279012.9 | 46537.6  | 412507.7 | 147622   | 479117.2 | 3042078  | 113233.3 | 1673369  |
| S4  | 23757.8  | 99996.8  | 192144.6 | 394557.2 | 42635.3  | 714165.3 | 598323.6 | 647200.8 | 2970440  | 120656.8 | 1462789  |
| S5  | 59650.2  | 102526   | 187001.3 | 131103.9 | 42577.2  | 1390480  | 0        | 620153.6 | 3259904  | 139071   | 1684003  |
| S6  | 33251.9  | 63502.7  | 206522.5 | 289521.7 | 44067.1  | 660231   | 648782.1 | 408117.1 | 2997900  | 112620.7 | 1434019  |
| S7  | 0        | 102795.2 | 206277.2 | 252452.6 | 40286.2  | 658024.2 | 616052.4 | 370032   | 3034993  | 113270.5 | 1527467  |
| S8  | 46782    | 82544.9  | 202737.3 | 357771.1 | 46290.8  | 811554.8 | 687896.2 | 622873.6 | 3214879  | 144978.3 | 1851041  |
| S9  | 34744.3  | 86796.8  | 198789.1 | 257982.5 | 36903.5  | 677976.3 | 599718.6 | 596698.9 | 3020282  | 118119.2 | 1402055  |
| S10 | 34987.8  | 76434.9  | 198029.2 | 288444.1 | 35437.3  | 706284.6 | 570703.3 | 587269.5 | 2977330  | 95219.6  | 1397261  |
| S11 | 35421.7  | 4834.257 | 187849.4 | 657155.1 | 38115.5  | 622628.4 | 584891   | 559229.8 | 2802572  | 110633.1 | 1350458  |
| S12 | 39476.8  | 4195.208 | 200984.1 | 1066.918 | 0        | 617762.7 | 1596.5   | 658.24   | 3456248  | 148724.1 | 1938390  |
| S13 | 35323.6  | 3772.061 | 208180.5 | 1169.459 | 81554    | 628680.6 | 2586.1   | 33345.5  | 3061870  | 0        | 1421036  |
| S14 | 35272.6  | 4766.383 | 220606.1 | 911.2423 | 77909    | 694722.7 | 562753.6 | 145.2    | 3456009  | 0        | 1863688  |
| S15 | 37771.2  | 3205.983 | 224910.7 | 1581.732 | 84300.4  | 707275.5 | 471523   | 2896.1   | 2536441  | 0        | 1324748  |
| S16 | 37695.6  | 3215.223 | 185817   | 817.2648 | 66905.6  | 664410.2 | 672540.2 | 610011.3 | 2958568  | 127993.9 | 1594374  |
| S17 | 35290.7  | 4205     | 272001.8 | 939.0761 | 77486.2  | 656876.2 | 596424.4 | 573705.7 | 3648163  | 126040.2 | 1775252  |
| S18 | 38421.4  | 4911.198 | 280746.9 | 882.8986 | 70598.8  | 707144.3 | 625425.1 | 668418.3 | 3106929  | 0        | 1655674  |
| S19 | 31040.4  | 4663.236 | 568.4    | 1056.983 | 96775.4  | 671503.7 | 752960.6 | 664157   | 456.87   | 131020.8 | 1788250  |
| S20 | 30642.7  | 4535.2   | 521.4    | 1270.47  | 66689.3  | 637203.4 | 595550.1 | 536893.4 | 358.47   | 124327.2 | 1454840  |
| S21 | 0        | 12209.54 | 1112.434 | 1066.918 | 92297.9  | 521200.2 | 629439.8 | 736696.2 | 1278.964 | 200946.3 | 2635548  |
| S22 | 25011.3  | 12430.15 | 1299.259 | 1169.459 | 91004.5  | 567345.7 | 515959   | 626688.9 | 1753.178 | 175612.9 | 2295586  |
| S23 | 0        | 11676.8  | 1233.66  | 911.2423 | 70170.5  | 549862.1 | 1586.1   | 702162.5 | 1208.139 | 173768.8 | 28159.4  |
| S24 | 156.5    | 11544.4  | 1203.116 | 1581.732 | 70707.6  | 554070.9 | 3873.2   | 707537.1 | 1038.817 | 175098.9 | 23446.4  |
| S25 | 28358.2  | 12427.84 | 1278.269 | 817.2648 | 91681.8  | 982224.4 | 0        | 752415.1 | 1672.063 | 195773.2 | 55210.9  |
| S26 | 158.38   | 11801.47 | 0        | 939.0761 | 0        | 622871.1 | 619943.6 | 497169.1 | 1352.8   | 186922   | 2550551  |
| S27 | 532.14   | 11198.65 | 229798.9 | 882.8986 | 77348.3  | 543908.3 | 402124.2 | 0        | 4196732  | 148236.1 | 2149864  |
| S28 | 1693     | 12421.53 | 296556.1 | 365.4    | 0        | 1216811  | 531179   | 0        | 5322178  | 202360.4 | 2773221  |
| S29 | 106303.7 | 9159.933 | 265417.3 | 457442   | 85173.7  | 1029162  | 634607   | 608075.3 | 4733977  | 169830.5 | 2262848  |
| S30 | 2873.1   | 386.4    | 244863.6 | 874475.1 | 38906.5  | 1011611  | 490734.7 | 507601   | 4375839  | 173582.7 | 2278229  |
| No  | G34      | G35      | G36      | G37      | G38      | G39      | G40      | G41      | G42      | G43      | G44      |
| S1  | 31250.2  | 669315.9 | 55417.3  | 45811.4  | 271450.6 | 142249.7 | 28038.6  | 330177   | 63382.9  | 234554.7 | 172465.5 |
| S2  | 49339.3  | 636833.1 | 42622.4  | 27745.7  | 213926.7 | 113126.8 | 24297.4  | 322175.5 | 44987.9  | 220133.9 | 163483.5 |
| S3  | 63929.3  | 721263.2 | 82786    | 36104    | 227142.3 | 243360.6 | 286.4    | 327518.5 | 45668.9  | 334466.2 | 0        |

|     |          |          |          |          |          |          |          |          |          |          |          |
|-----|----------|----------|----------|----------|----------|----------|----------|----------|----------|----------|----------|
| S4  | 63907.7  | 646101   | 83456.5  | 48209.5  | 248953.2 | 226509.5 | 19502.2  | 268721.7 | 43963    | 216952.2 | 139725.1 |
| S5  | 55385.3  | 694981.4 | 157753.7 | 37875.6  | 223614.6 | 224645.9 | 4091.911 | 333480.7 | 57688.7  | 263594.8 | 167054.7 |
| S6  | 28100.4  | 694152   | 44584.3  | 41515.8  | 232406.4 | 128781.3 | 2345.743 | 333842   | 54327.4  | 229577.7 | 165094.3 |
| S7  | 26515.7  | 758912.4 | 40421.9  | 32349.1  | 222516   | 132272.6 | 2409.337 | 383771.4 | 57226.8  | 107979.1 | 38077.2  |
| S8  | 59647.9  | 886172.1 | 65458.4  | 56151.5  | 293153   | 164041.5 | 2988.005 | 257514.6 | 69132.8  | 179432.6 | 142293.3 |
| S9  | 74783.2  | 649821.2 | 77673.3  | 29012.9  | 212150.6 | 210248.9 | 3829.67  | 294798.1 | 37393.2  | 249405   | 166238.2 |
| S10 | 65036.7  | 587367.6 | 76114.7  | 33337.2  | 206569.4 | 201643   | 3672.914 | 275664.9 | 69872.4  | 241129.6 | 119955.3 |
| S11 | 47359    | 592965.2 | 166517.8 | 31342.9  | 194282.7 | 187572.2 | 3416.616 | 275515   | 41920.2  | 214497.8 | 138120.5 |
| S12 | 59182.4  | 861064.3 | 159062.2 | 37522.9  | 241905.3 | 156541   | 2851.384 | 316001.7 | 68209.1  | 242605.8 | 176944.9 |
| S13 | 59742.4  | 815921.4 | 162321.7 | 45101.7  | 254903.9 | 188294.3 | 3429.769 | 276575.9 | 65813.3  | 354086.9 | 0        |
| S14 | 78962.2  | 966799.1 | 120025.4 | 301766.6 | 3996.909 | 229070.9 | 229.3    | 340248.7 | 121683.1 | 400406.9 | 0        |
| S15 | 45739.5  | 778424.5 | 110370.5 | 47686    | 631.6026 | 147102.3 | 39217.1  | 235680.2 | 77678    | 172724.4 | 140147.7 |
| S16 | 56302.5  | 686238.5 | 172225.5 | 218955.1 | 2900.068 | 230069.9 | 0        | 230304.3 | 73641.2  | 353297   | 3661.109 |
| S17 | 54773.6  | 855066   | 137407.3 | 269386.9 | 3568.038 | 208100.1 | 35561.4  | 314654.1 | 69431    | 385298.6 | 3992.732 |
| S18 | 739132.7 | 26233.9  | 167924.5 | 227973.1 | 3019.511 | 212141.5 | 2424.474 | 253517.6 | 0        | 363717   | 3769.088 |
| S19 | 772866.7 | 23697.7  | 225996.9 | 281715.6 | 3731.332 | 277369.4 | 3169.936 | 295854.7 | 92298.4  | 375369.8 | 3889.842 |
| S20 | 695756.3 | 30487.5  | 149569.9 | 206995.6 | 2741.664 | 200810   | 2294.971 | 232429.7 | 68081    | 316081.7 | 3275.458 |
| S21 | 1122591  | 11633.07 | 162602.7 | 331391.7 | 8607.577 | 123231.4 | 62696.5  | 470769.7 | 103227.9 | 718395.9 | 7444.517 |
| S22 | 1133904  | 11750.3  | 110909.5 | 283508.2 | 7363.849 | 133387.2 | 50545.4  | 499383.7 | 131657.8 | 683214.2 | 17745.82 |
| S23 | 1130480  | 11714.81 | 171918.3 | 298359.1 | 7749.587 | 53688.8  | 46525.2  | 440327.2 | 108352.4 | 741912.1 | 19270.44 |
| S24 | 1139133  | 11804.48 | 173234.3 | 300642.9 | 7808.906 | 54099.7  | 46881.3  | 443697.6 | 109181.8 | 747591   | 19417.95 |
| S25 | 1288230  | 13349.54 | 146392.4 | 331845.6 | 8619.366 | 61022.7  | 60197.3  | 527893.5 | 103786.1 | 825676.5 | 21446.14 |
| S26 | 1058238  | 10966.2  | 159260.7 | 304449.4 | 7907.777 | 130342.3 | 53542.3  | 433816.5 | 102374.7 | 682511.8 | 17727.58 |
| S27 | 39362.1  | 1000271  | 100508.3 | 47725.1  | 1239.613 | 83230.2  | 58325.5  | 447120.5 | 85588.4  | 308281.4 | 8007.309 |
| S28 | 44842.5  | 1181746  | 0        | 84151.1  | 372690.1 | 120360.9 | 146561.8 | 793855   | 196212.1 | 591114.1 | 15353.61 |
| S29 | 60124.6  | 947145.5 | 59388.7  | 0        | 289032.1 | 133859.4 | 0        | 464823.2 | 95523.6  | 353630.4 | 284131.4 |
| S30 | 32328.1  | 932482.6 | 98215    | 45253    | 249315.8 | 110071.1 | 57154.9  | 481205.2 | 0        | 329198.1 | 288714.4 |
| No  | G45      | G46      | G47      | G48      | G49      | G50      | G51      | G52      | G53      | G54      | G55      |
| S1  | 91693.1  | 22910.8  | 16667.3  | 52980.4  | 18879.4  | 707726.5 | 153136   | 34449.3  | 12142.1  | 33098.3  | 381066   |
| S2  | 76910.3  | 21115.1  | 15256.8  | 375.2    | 0        | 458754   | 74690.3  | 29981.9  | 97.5     | 763.2    | 296913.9 |
| S3  | 88160.6  | 19464.2  | 15179.3  | 679.2    | 18776.8  | 595431.1 | 122221.2 | 40957.3  | 39.5     | 34674.1  | 377689.5 |
| S4  | 85594.3  | 21509.9  | 14222.7  | 45725.8  | 23454.8  | 829036.8 | 148303.5 | 50177.1  | 17478.1  | 33924.1  | 471606.9 |
| S5  | 94346.7  | 23466.7  | 21504.7  | 54521.8  | 19906.6  | 645224.5 | 128328   | 36612.4  | 256.1    | 33550    | 392249.4 |
| S6  | 85520.5  | 21539.2  | 16336.6  | 185.6    | 21449.6  | 602064.2 | 112136.6 | 36334.7  | 123.4    | 689.4    | 430839.5 |
| S7  | 37789.2  | 21875.9  | 10982.3  | 51325.1  | 32036.1  | 666619.5 | 147966.4 | 31799.6  | 289.4    | 896.5    | 454429.9 |
| S8  | 99176.5  | 22358.1  | 18238.3  | 50482.9  | 23962.3  | 746347.2 | 115275.8 | 53096    | 357.1    | 37308.9  | 519400.7 |
| S9  | 82552.5  | 21393.2  | 15885.9  | 135.2    | 20323.1  | 689054.5 | 138225.7 | 38564.5  | 197.5    | 26108    | 377155.3 |
| S10 | 50532.8  | 17645.5  | 12484.1  | 23947.8  | 13565.1  | 605324.7 | 120898.2 | 40086.4  | 153.8    | 21971.6  | 418957.3 |
| S11 | 95753.9  | 15192.4  | 15681.5  | 31725.6  | 18908.4  | 653836.6 | 123669.3 | 37201.7  | 368.4    | 31177.7  | 377962   |
| S12 | 76776.6  | 19463.2  | 31943.3  | 63181.8  | 0        | 705600.1 | 136863.6 | 42592.5  | 178.9    | 31958.9  | 479087.6 |
| S13 | 71882.5  | 22158.2  | 23300.7  | 43341.3  | 15567.4  | 914572.5 | 163720.4 | 54409.3  | 35515.1  | 55892.3  | 576024.6 |
| S14 | 82854.8  | 23950.3  | 27954.5  | 46384.6  | 24494.4  | 828818.5 | 155283.9 | 51076.7  | 538.4    | 54317.2  | 573838.2 |
| S15 | 79375.2  | 37374.4  | 23306.1  | 39980.4  | 19854    | 746551.3 | 97746.4  | 51661.8  | 19799.5  | 30613.7  | 550518.6 |
| S16 | 58686.3  | 26233.9  | 22963.8  | 22380.8  | 1406.17  | 596369.1 | 113414.3 | 38605.4  | 863.4    | 44949.6  | 394974.4 |
| S17 | 51387.2  | 23697.7  | 28023.9  | 27440.9  | 1345.484 | 807018.5 | 148171.1 | 48657.7  | 18151.2  | 35792.5  | 556153.1 |
| S18 | 70547.6  | 30487.5  | 22843.4  | 22260.4  | 1109.78  | 688284.3 | 133323   | 42682.7  | 189.5    | 77884.9  | 461884.3 |
| S19 | 86517    | 28648.5  | 22170.4  | 46730.7  | 955.4969 | 868938.9 | 160623.3 | 56230.1  | 15662.7  | 41193.4  | 545625.3 |
| S20 | 59652.2  | 28159.4  | 19140.6  | 33095.1  | 1224.101 | 634724.6 | 119177.9 | 41376.4  | 368.7    | 35251.9  | 435861.6 |
| S21 | 120270.1 | 55210.9  | 30643.1  | 33579.3  | 0        | 768227.1 | 224789.5 | 41801.1  | 27989.7  | 49164.7  | 406072.6 |
| S22 | 90423.7  | 45952.3  | 37444.1  | 372.5    | 0        | 642981.1 | 164187.5 | 36018.4  | 32833.1  | 189.5    | 357332.1 |
| S23 | 152066.6 | 55571.7  | 28458.7  | 46130.9  | 21340.2  | 605716   | 257214.3 | 36175.6  | 26405.3  | 387      | 317626.4 |
| S24 | 153230.5 | 55997.1  | 28676.6  | 224.8    | 0        | 610352.3 | 237592.5 | 36452.5  | 26607.5  | 19636.5  | 320057.6 |
| S25 | 141535.7 | 60737.1  | 30333.2  | 50133.2  | 0        | 609554.2 | 164888.1 | 31350.9  | 18844.4  | 28730.4  | 362368.7 |
| S26 | 96395.7  | 53526.4  | 27567.3  | 179.2    | 30301.2  | 589460.1 | 187424   | 32731.1  | 223.1    | 49472.4  | 342872   |
| S27 | 53462.3  | 17627.3  | 18818.7  | 62036.8  | 14350.5  | 534662.8 | 102933   | 30005.5  | 9770.8   | 14173.6  | 324361.9 |
| S28 | 118175.8 | 28257.7  | 26422.5  | 71689.2  | 62261.2  | 447429.6 | 150565   | 68301    | 198.5    | 258.2    | 302466.1 |
| S29 | 112732.9 | 31527.4  | 19625.6  | 67702    | 38311.6  | 780327.1 | 161328.8 | 44230.5  | 21084.7  | 56508.3  | 421486.8 |
| S30 | 118454.8 | 26969.4  | 21669.1  | 58757.1  | 31137.8  | 544625.5 | 146507.5 | 31597.5  | 12.8     | 168.2    | 315309.7 |
| No  | G56      | G57      | G58      | G59      | G60      | G61      | G62      | G63      | G64      |          |          |
| S1  | 327775.2 | 202945.3 | 24436.5  | 22012.4  | 571705.6 | 123302.2 | 88129.8  | 61201.1  | 24632.1  |          |          |
| S2  | 228035.1 | 120069.3 | 458.5    | 689.1    | 136533.8 | 38316.3  | 23715.2  | 12036.2  | 369.5    |          |          |
| S3  | 288424.6 | 98279.3  | 13034.5  | 736.5    | 179499.1 | 10835    | 387.5    | 465.8    | 258.6    |          |          |
| S4  | 485349.7 | 236641.9 | 27440    | 18621.6  | 977764.3 | 81747.9  | 47575.8  | 28316.5  | 654.8    |          |          |
| S5  | 431698.2 | 128022.7 | 27966.3  | 4077.313 | 511388.7 | 27863.9  | 389.4    | 258.6    | 257.6    |          |          |
| S6  | 416311.7 | 133272.2 | 26137.6  | 4806.063 | 589030.7 | 30777.7  | 756.8    | 365.7    | 4542.4   |          |          |
| S7  | 259049.1 | 203079.8 | 3987.5   | 5557.281 | 789553.3 | 49692    | 24711.7  | 18176.1  | 25.1     |          |          |

|     |          |          |         |          |          |          |         |         |         |
|-----|----------|----------|---------|----------|----------|----------|---------|---------|---------|
| S8  | 454677.2 | 182338   | 32934.1 | 2485.563 | 691592.5 | 35949.6  | 478.5   | 6227.4  | 5067.1  |
| S9  | 431412.3 | 173475.5 | 32157.5 | 2504.586 | 669668.8 | 58542.2  | 15962.9 | 7008.4  | 9118.5  |
| S10 | 425527.8 | 151191.4 | 32391.5 | 2227.063 | 690049.1 | 32505.1  | 5467.7  | 4843    | 5165.3  |
| S11 | 398876.8 | 152592.2 | 30276.5 | 2855.422 | 618388.9 | 39604.8  | 4612.4  | 4992.1  | 7043.7  |
| S12 | 508381   | 200783.6 | 42122.6 | 1934.039 | 923415   | 49936.8  | 18681.6 | 13945.7 | 7253.8  |
| S13 | 498164.8 | 268243.4 | 41710.4 | 834.3281 | 987394.7 | 106724.2 | 56196.3 | 36936.8 | 15994.4 |
| S14 | 449064.8 | 207955   | 40118.3 | 14995.4  | 883580.1 | 47791.1  | 15575   | 9854.7  | 8259.5  |
| S15 | 456264.4 | 226035.6 | 38413.2 | 14167.3  | 816964.4 | 66389    | 30009.6 | 21742.6 | 5949    |
| S16 | 397323.3 | 149305.2 | 34881.5 | 687.5    | 637259.9 | 37606.8  | 4058    | 2764.9  | 7569.3  |
| S17 | 476359.5 | 202928.2 | 36526.3 | 14698.9  | 787902.7 | 52750.7  | 23271   | 16717   | 7247.7  |
| S18 | 269670.9 | 154688.6 | 789.2   | 12113.7  | 651329.4 | 39388.6  | 4617.4  | 4987.8  | 7235.5  |
| S19 | 525021.1 | 255674.7 | 41522.2 | 186.4    | 1065012  | 81375.1  | 40057.1 | 36612.4 | 16430.5 |
| S20 | 422001.4 | 148998.2 | 25503.7 | 398.7    | 648391.2 | 30484.8  | 2253.1  | 3578.3  | 5412    |
| S21 | 622673.2 | 227487.2 | 39933.2 | 20806.9  | 1112136  | 61517.6  | 69724.1 | 49089.7 | 156.8   |
| S22 | 472041.9 | 186800.9 | 36618.1 | 3293.93  | 928675.5 | 71133.2  | 69532.8 | 59133.2 | 23.5    |
| S23 | 460140   | 127886.8 | 29515.5 | 3324.449 | 688995.8 | 31815.2  | 18463.6 | 10709.4 | 289.2   |
| S24 | 433310.2 | 128865.7 | 29312.5 | 4374.37  | 687539.3 | 32058.7  | 18604.9 | 10791.4 | 5070.4  |
| S25 | 516368.7 | 135854.1 | 37825.1 | 5844.083 | 925128.2 | 28506.4  | 18532.9 | 13113.6 | 147.8   |
| S26 | 473976.4 | 152124.5 | 32688.1 | 4530.61  | 881471.5 | 36549.4  | 11522.9 | 8328.5  | 5965    |
| S27 | 370192.8 | 133197.8 | 30530.5 | 4924.523 | 748037   | 24755.7  | 34398.7 | 23248.2 | 136.5   |
| S28 | 390511.5 | 62670.2  | 26907.8 | 3252.837 | 738634.5 | 10679.4  | 4833.8  | 5595.8  | 478.3   |
| S29 | 554434.9 | 222354   | 21273.5 | 4421.094 | 1096619  | 45702.8  | 38300.5 | 32963.9 | 785.2   |
| S30 | 417154.1 | 131450.1 | 32443.5 | 3370.122 | 806566.8 | 29865.9  | 14391.5 | 6920.8  | 3932.9  |

a: G represent chromatographic peak number;

b: S represent sample number.

30×64 data matrix, 30 was the number of the samples; each row represented a CG sample and each column contained the values of 64 characteristic peak areas.
